# Supplementary material
Source: PubMed Central journal article supplement (PMC8805441)
Supplement: NIHMS1769363-supplement-Supp_Info_2.pdf [file NIHMS1769363-supplement-Supp_Info_2.pdf]

**Table S1A. Read statistics for 8 drosophila CLEAR-CLIP samples.**

| sampleName | Raw Reads | clean Reads | Uniq Reads | Mapped Reads | Chimeric Reads | Percentage |
|------------|-----------|-------------|------------|--------------|----------------|------------|
| W01        | 22252916  | 22166118    | 2607404    | 1104091      | 18398          | 1.67%      |
| W02        | 18229939  | 18194988    | 2204986    | 950071       | 16954          | 1.05%      |
| W03        | 20063980  | 20005202    | 3417700    | 1578808      | 25779          | 1.02%      |
| W04        | 48304093  | 47895896    | 4951811    | 2946369      | 68635          | 1.79%      |
| C01        | 23493584  | 23438634    | 2356272    | 873423       | 17674          | 1.02%      |
| C02        | 24206211  | 24047074    | 3333769    | 1296768      | 25325          | 1.03%      |
| C03        | 11505949  | 11487289    | 1244821    | 464129       | 9733           | 1.05%      |
| C04        | 45347628  | 45216440    | 4062840    | 2094932      | 51894          | 1.66%      |

**Table S1B. Experimentally Validated miRNA Targets Found in chimeras supported interactions**

| miRNA          | Genes            | Number of chimeric reads | Found in Experiments                         |
|----------------|------------------|--------------------------|----------------------------------------------|
| dme-bantam-3p  | hid              | 58                       | $W^{1118}$ (whole body), $W^{1118}$ (head)   |
| dme-let-7-5p   | ab               | 12                       | $W^{1118}$ (head)                            |
| dme-miR-11-3p  | E(spl)malpha-BFM | 13                       | $W^{1118}$ (whole body)                      |
| dme-miR-124-3p | gli              | 20                       | $clk^{jrk}$ (head)                           |
| dme-miR-1-3p   | tutl             | 14                       | $W^{1118}$ (head)                            |
| dme-miR-1-3p   | CG18542          | 5                        | $W^{1118}$ (whole body)                      |
| dme-miR-1-3p   | DI               | 10                       | $clk^{jrk}$ (Whole body), $clk^{jrk}$ (head) |
| dme-miR-1-3p   | Msr-110          | 8                        | $clk^{jrk}$ (whole body)                     |
| dme-miR-1-3p   | Chd64            | 13                       | $W^{1118}$ (head)                            |
| dme-miR-14-3p  | EcR              | 5                        | $W^{1118}$ (head)                            |
| dme-miR-14-3p  | sug              | 6                        | $W^{1118}$ (whole body)                      |
| dme-miR-14-3p  | IP3K2            | 4                        | $W^{1118}$ (whole body)                      |
| dme-miR-34-5p  | Su(z)12          | 2                        | $W^{1118}$ (whole body)                      |
| dme-miR-7-5p   | E(spl)m3-HLH     | 1                        | $W^{1118}$ (whole body)                      |
| dme-miR-7-5p   | h                | 21                       | $W^{1118}$ (head)                            |
| dme-miR-8-3p   | wls              | 2                        | $clk^{jrk}$ (whole body)                     |
| dme-miR-8-3p   | pan              | 7                        | $clk^{jrk}$ (whole body)                     |

**Table S1C. miRNA-first and miRNA-last distribution found in CLEAR-CLIP**

| sample            | $W^{1118}$ |            | $clk^{jrk}$ |            |
|-------------------|------------|------------|-------------|------------|
|                   | head       | Whole body | Head        | Whole body |
| miRfirst chimeric | 4500       | 6697       | 2271        | 4151       |
| miRlast chimeric  | 269        | 590        | 214         | 346        |

**Table S2. The primers are used in this study**

---

|           |                               |
|-----------|-------------------------------|
| tim-yg-F  | AGTCGCCACTCACCATTCCCT         |
| tim-yg-R  | CGTTGTTCTTCTTGCTCTGC          |
| actin-F   | CCAACCGTGAGAAGATGA            |
| actin-R   | GGAGTCCAGAACGATACC            |
| 2s        | TGCTTGGACTACATATGGTTGAGGG     |
| miR-375   | CGACGTTTGTTCGTTTGGCTTAAGTTA   |
| miR-9c    | GCGATTGTA CTTCATCAGGTGCTCTG   |
| mir-276a  | CAGTCA GACCCC ATGTAG GAACTT C |
| miR-305   | cgcATTGTACTTCATCAGGTGCTCTG    |
| Pdp1-F    | CCGATTCCCTGGGTCAC             |
| Pdp1-R    | GCGATGGCGGATTTAGC             |
| Vri-F     | GTCGGTCGAGCCGTAA              |
| Vri-R     | TTGTGCAGTTCGGGGTT             |
| rp49-F    | TCGGTTACGGATCGAACAA           |
| rp49-R    | GACAATCTCCTTGCGTTCT           |
| U27-F     | GCTGATGACAAACCAATAGACAAGCA    |
| miR-210-F | AGCTGCTGGCCACTGCACAAGAT       |

---
